# Supplementary material
Source: PubMed Central journal article supplement (PMC2583351)
Supplement: NIHMS2778-supplement-SuppMat.pdf [file NIHMS2778-supplement-SuppMat.pdf]

**Supplementary Fig. S1.** Models of the FIPV WSU-79/1146 RNA 5' UTR *cis*-acting elements. The putative 5' UTR stem-loop structure (nt 102–140) (a) and the putative leader–TRS hairpin (nt 65–128) (b) are shown. Nucleotides that comprise the 'core' TRS motif (5'-CUAAAC-3') are highlighted with a grey background and nucleotides that comprise the four-codon 'mini-ORF' are highlighted with a black background.

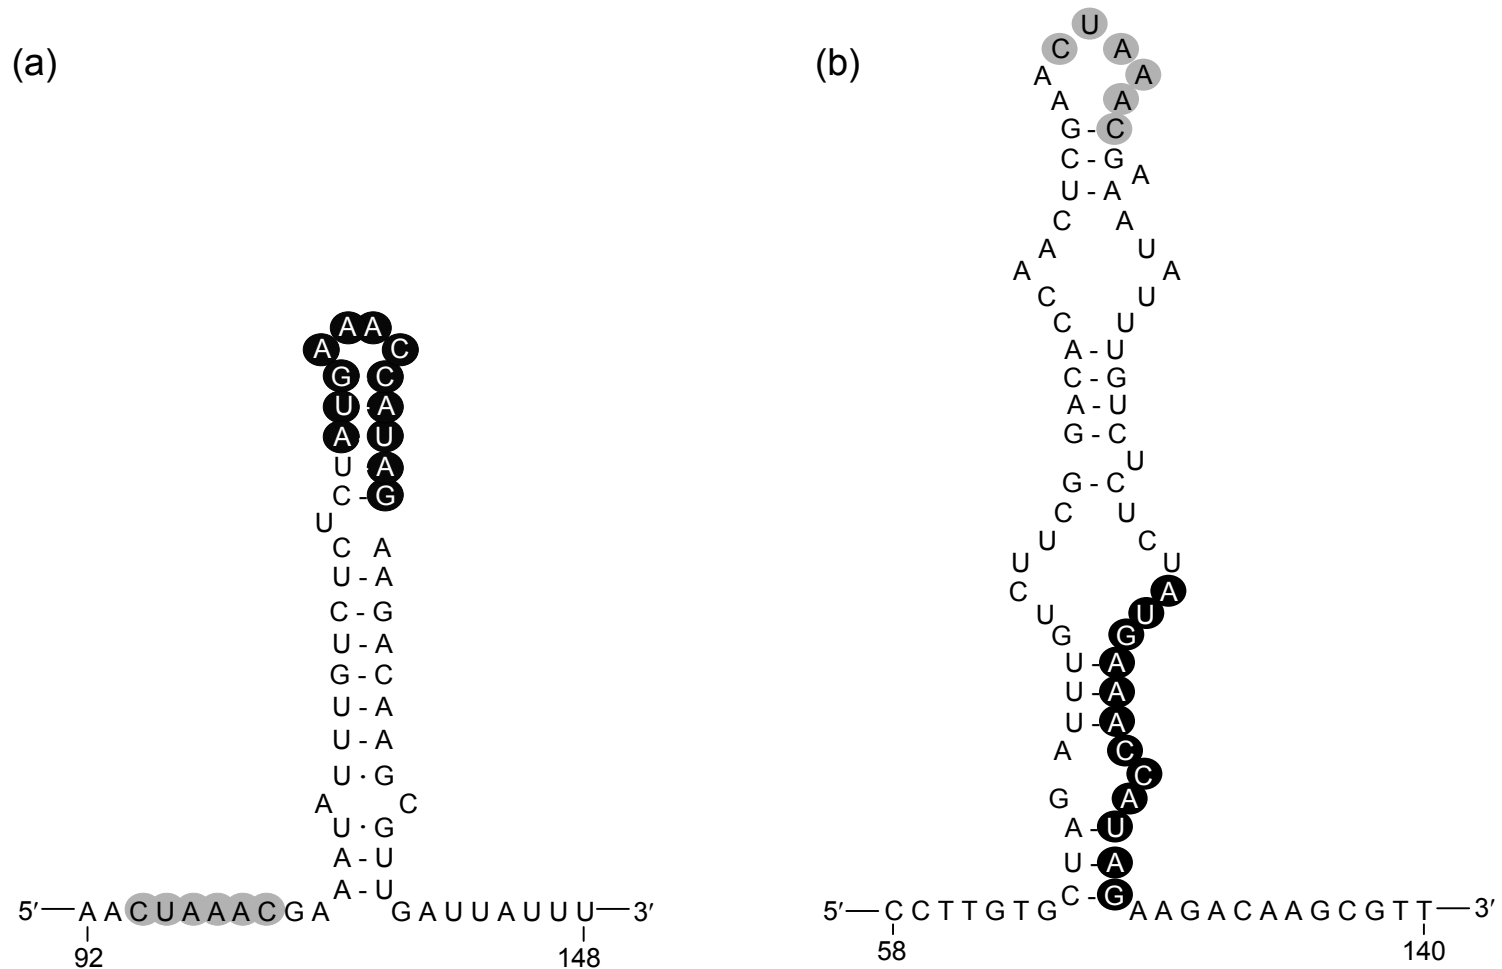

**Dye, C. & Siddell, S. G. (2005).** Genomic RNA sequence of *Feline coronavirus* strain FIPV WSU-79/1146. *J Gen Virol* **86**, 2249–2253.

© 2005 SGM

**Supplementary Fig. S2.** Model of the FIPV WSU-79/1146 RNA 3' UTR *cis*-acting element. The putative 3' UTR bulged stem-loop-pseudoknot structure (nt 28842–28964) is shown. Nucleotides that comprise the last six codons of the predicted ORF 7b are highlighted with a black background.

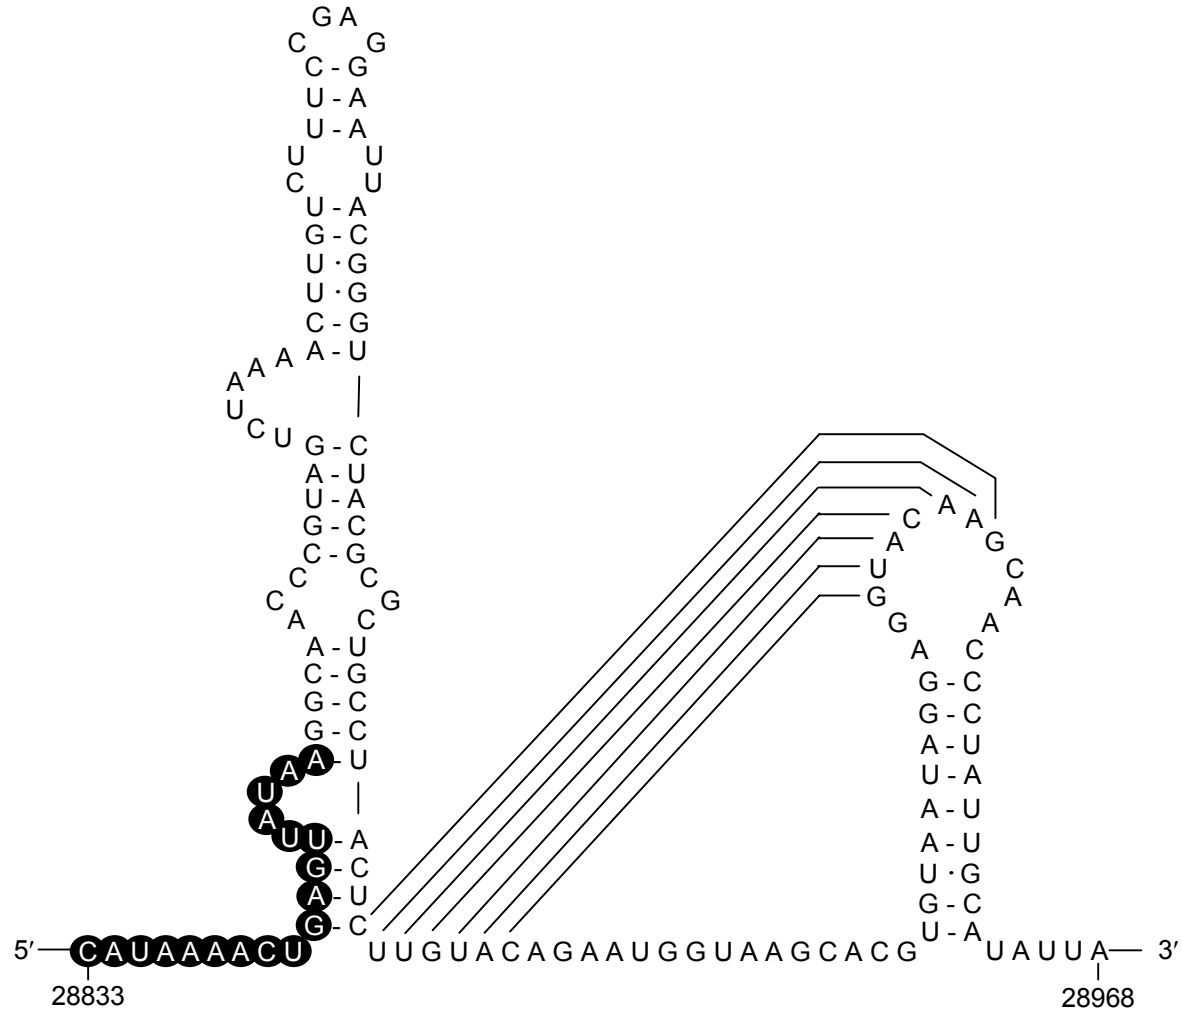

**Dye, C. & Siddell, S. G. (2005).** Genomic RNA sequence of *Feline coronavirus* strain FIPV WSU-79/1146. *J Gen Virol* **86**, 2249–2253.

© 2005 SGM



**Supplementary Table S1.** List of oligonucleotide primers used for RT-PCR amplification of FIPV WSU-79/1146 RNA

Genomic or intracellular poly(A)-containing viral RNA was reverse-transcribed by using Superscript II RNase H<sup>-</sup> reverse transcriptase (Invitrogen) and gene-specific priming under standard conditions. PCR amplification of genomic fragments was done by using 2 µl cDNA template from the RT reaction, Platinum PCR Supermix High Fidelity (Invitrogen) and PCR primers that were incubated for 2 min at 94 °C, followed by 35 cycles of 94 °C for 30 s, 55 °C for 30 s and 68 °C for 1 min (kb PCR product)<sup>-1</sup>. PCR amplification of subgenome length mRNA 5' ends was done by using 2 µl cDNA template from the RT reaction, recombinant *Taq* DNA polymerase and primers that were incubated for 2 min at 94 °C, followed by 35 cycles of 94 °C for 15 s, 56 °C for 30 s and 72 °C for 1 min, with a final incubation for 7 min at 72 °C. The 5'-terminal sequence of genomic viral RNA was determined by 5'-RACE (rapid amplification of cDNA ends). Briefly, a preparation of genomic RNA was dephosphorylated and the RNA cap structure was removed by incubation with tobacco acid pyrophosphatase. The RNA oligonucleotide (5'-CGACUGGAGCACGAGGACACUGACAUGGACUGAAGGAGUAGAAA-3') was ligated to 5'-phosphorylated RNA, which was then recovered by phenol/chloroform extraction and ethanol precipitation. This RNA was used as a template for RT-PCR with appropriate primers and the conditions described above for genomic RNA. NA, Not applicable; N = A, C, G or T.

| Name | Use                                             | Sequence (5'-3')                          | Position                       |
|------|-------------------------------------------------|-------------------------------------------|--------------------------------|
| CJ01 | RT primer for 3' RACE                           | TGTTGGAGGGTAATGGGGTTGAAT <sub>23</sub> NN | 29124 and 29125 + poly(A) tail |
| CJ28 | RT primer for 5' RACE                           | CAAAGAATGCACTATCAAGACC                    | 1827-1848                      |
| CJ04 | Forward PCR primer for fragment I               | TATAAGGCAACCCGATGTCTAAAA                  | 28844-28869                    |
| CJ02 | Reverse PCR primer for fragment I               | TGTTGGAGGGTAATGGGGTTGAA                   | NA                             |
| CJ05 | Forward PCR primer for fragment H               | AGTCCTGCTTTGATGGTGGTG                     | 26096-26116                    |
| CJ03 | RT primer and reverse PCR primer for fragment H | TCATAGCGGATCTTTAACTTCTC                   | 29012-29035                    |
| CJ07 | Forward PCR primer for fragment G               | TACTGGTGGTTACGACATAGC                     | 23166-23186                    |
| CJ06 | Reverse PCR primer for fragment G               | GCCATAATAGCCACATAATAAGC                   | 26135-26157                    |
| CJ09 | Forward PCR primer for fragment F               | TCGGCTTATAGGGATGATGTG                     | 20560-20580                    |
| CJ08 | Reverse PCR primer for fragment F               | TTTAGCAACAGTGGCAAGACC                     | 23488-23508                    |
| CJ11 | Forward PCR primer for fragment E               | ATGCAGGCTGGCTTTACGATA                     | 18203-18223                    |
| CJ10 | RT primer and reverse PCR primer for fragment E | TTGTCCGTGGGTATGACAGAGAAAGG                | 20701-20726                    |
| CJ13 | Forward PCR primer for fragment D               | GTAGTAGCAGCATTGATGAAGAATTTG               | 14337-14363                    |

**Dye, C. & Siddell, S. G. (2005).** Genomic RNA sequence of *Feline coronavirus* strain FIPV WSU-79/1146. *J Gen Virol* **86**, 2249-2253.

**Supplementary Table S1. cont.**

| Name | Use                                             | Sequence (5'-3')                | Position    |
|------|-------------------------------------------------|---------------------------------|-------------|
| CJ12 | Reverse PCR primer for fragment D               | AACGACATTAAGCCACATT             | 18299–18319 |
| CJ15 | Forward PCR primer for fragment C               | ATGCGTTTTGGGTGTTGTGCTG          | 9001–9024   |
| CJ14 | RT primer and reverse PCR primer for fragment C | CAAATTCTTCATCAATGCTGCTACTAC     | 14337–14363 |
| CJ17 | Forward PCR primer for fragment B               | GAGGCTAAGTGCTTTGTGCTTGGTTCTAA   | 1731–1759   |
| CJ16 | RT primer and reverse PCR primer for fragment B | CTGGCCTCACGGATTTAAATTTATGTTCTGG | 9081–9111   |
| CJ19 | Forward PCR primer for fragment A               | CGACTGGAGCACGAGGACACTGACAT      | NA          |
| CJ18 | Reverse PCR primer for fragment A               | CACCATCCTTAAGCGCTCTGAAACACAAC   | 2210–2238   |
| CJ20 | Forward PCR primer for mRNA PCR                 | TGAGGGTGGCGTGGCTATAACTC         | 16–38       |
| CJ21 | RT and reverse primer for mRNA 1 PCR            | ACATGACGGAAGGTTCCGTAAGGAGA      | 536–561     |
| CJ22 | RT and reverse primer for mRNA 2 PCR            | TAACCACCAACAACACTTCTTCTTC       | 20353–20381 |
| CJ23 | RT and reverse primer for mRNA 3 PCR            | AACAACGTATGACTATTGACTTCTTCA     | 24816–24843 |
| CJ24 | RT and reverse primer for mRNA 4 PCR            | TAGTCTTACCCAAATTGCAACATACCA     | 25852–25878 |
| CJ25 | RT and reverse primer for mRNA 5 PCR            | AGCCGAACATTACATATCTGGAACTTG     | 26302–26329 |
| CJ26 | RT and reverse primer for mRNA 6 PCR            | CCTTACGCTGGCCTTTTACAATACGATA    | 27007–27034 |
| CJ27 | RT and reverse primer for mRNA 7 PCR            | AATCAAGGCAGTCTGGTTTCAA          | 28088–28109 |

---

**Dye, C. & Siddell, S. G. (2005).** Genomic RNA sequence of *Feline coronavirus* strain FIPV WSU-79/1146. *J Gen Virol* **86**, 2249–2253.

**Supplementary Table S2.** FIPV WSU-79/1146 genomic ORFs and encoded non-structural and structural proteins

| ORF (nucleotide positions) | Translation product (aa)   | Amino acid identity (%) |           |      |      |
|----------------------------|----------------------------|-------------------------|-----------|------|------|
|                            |                            | TGEV                    | HCoV-229E | MHV  | IBV  |
| ORF1a (312–12209)          | Polyprotein 1a (3965)      | 88.1                    | 51.5      | 34.7 | 33.2 |
| ORF1ab (312–20209)         | Polyprotein 1ab (6632)     | 91.5                    | 58.1      | 41.1 | 39.8 |
| ORF S (20206–24564)        | Spike glycoprotein (1452)  | 94.8                    | 49.8      | 30.0 | 33.5 |
| ORF E (25722–25970)        | Envelope protein (82)      | 74.7                    | 28.2      | 29.2 | 21.1 |
| ORF M (25981–26769)        | Membrane protein (262)     | 85.5                    | 46.4      | 37.8 | 26.8 |
| ORF N (26782–27915)        | Nucleocapsid protein (377) | 76.2                    | 39.1      | 26.0 | 24.5 |

---

**Dye, C. & Siddell, S. G. (2005).** Genomic RNA sequence of *Feline coronavirus* strain FIPV WSU-79/1146. *J Gen Virol* **86**, 2249–2253.

© 2005 SGM

**Supplementary Table S3.** Main features of FIPV WSU-79/1146 structural proteins

*N*-Glyc, *N*-Glycosylation sites; *O*-Glyc, *O*-glycosylation sites. Potential glycosylation sites were identified with NetNGlyc and NetOGlyc (<http://www.cbs.dtu.dk/>).

| Protein              | Glycosylation (predicted sites) | Feature                    |                 |                               |
|----------------------|---------------------------------|----------------------------|-----------------|-------------------------------|
|                      |                                 | Domain                     | Position        | Reference                     |
| Spike protein        | Yes                             | Signal peptide             | 1Met–Ser19      | de Groot <i>et al.</i> (1987) |
|                      | <i>N</i> -Glyc, 35              | Ectodomain                 | 20Thr–Pro1393   | de Groot <i>et al.</i> (1987) |
|                      | <i>O</i> -Glyc 1                | Transmembrane domain       | 1394Trp–Cys1414 | de Groot <i>et al.</i> (1987) |
|                      |                                 | Endodomain                 | 1415Cys–His1452 | de Groot <i>et al.</i> (1987) |
|                      |                                 | Heptad-repeat region 1     | 1014Pro–Thr1156 | Bosch <i>et al.</i> (2004)    |
|                      |                                 | Heptad-repeat region 2     | 1308Pro–Val1390 | Bosch <i>et al.</i> (2004)    |
|                      |                                 | Putative fusion peptide    | 1022Ala–Gln1047 | Bosch <i>et al.</i> (2004)    |
|                      |                                 | Envelope protein           | No              | Signal anchor sequence        |
| Membrane protein     | Yes                             | Signal peptide             | 1Met–Gly17      | Vennema <i>et al.</i> (1991)  |
|                      | <i>N</i> -Glyc, 3               | Ectodomain                 | 18Glu–Ser57     | Vennema <i>et al.</i> (1991)  |
|                      |                                 | Membrane-spanning domain 1 | 58Trp–Ser77     | Vennema <i>et al.</i> (1991)  |
|                      |                                 | Membrane-spanning domain 2 | 83Ile–Tyr104    | Vennema <i>et al.</i> (1991)  |
|                      |                                 | Membrane-spanning domain 3 | 114Met–Val134   | Vennema <i>et al.</i> (1991)  |
|                      |                                 | Endodomain                 | 135Arg–Val262   | Vennema <i>et al.</i> (1991)  |
| Nucleocapsid protein | No                              | Basic domain 1             | 153Val–Asn183   | Laude & Masters (1995)        |
|                      |                                 | Basic domain 2             | 203Thr–Gly240   | Laude & Masters (1995)        |
|                      |                                 | Acidic domain              | 350Glu–Asn377   | Laude & Masters (1995)        |

**Dye, C. & Siddell, S. G. (2005).** Genomic RNA sequence of *Feline coronavirus* strain FIPV WSU-79/1146. *J Gen Virol* **86**, 2249–2253.

## References

- Bosch, B. J., Martina, B. E. E., van der Zee, R. & 7 other authors (2004).** Severe acute respiratory syndrome coronavirus (SARS-CoV) infection inhibition using spike protein heptad repeat-derived peptides. *Proc Natl Acad Sci U S A* **101**, 8455–8460.
- de Groot, R. J., Maduro, J., Lenstra, J. A., Horzinek, M. C., van der Zeijst, B. A.M. & Spaan, W. J. M. (1987).** cDNA cloning and sequence analysis of the gene encoding the peplomer protein of feline infectious peritonitis virus. *J Gen Virol* **68**, 2639–2646.
- Laude, H. & Masters, P. S. (1995).** The coronavirus nucleocapsid protein. In *The Coronaviridae*, pp. 141–163. Edited by S. G. Siddell. New York: Plenum.
- Vennema, H., de Groot, R. J., Harbour, D. A., Horzinek, M. C. & Spaan, W. J. M. (1991).** Primary structure of the membrane and nucleocapsid protein genes of feline infectious peritonitis virus and immunogenicity of recombinant vaccinia viruses in kittens. *Virology* **181**, 327–335.

---

**Dye, C. & Siddell, S. G. (2005).** Genomic RNA sequence of *Feline coronavirus* strain FIPV WSU-79/1146. *J Gen Virol* **86**, 2249–2253.
